# Supplementary material
Source: HighWire-hosted journal article supplement (https://qualitysafety.bmj.com/content/29/7/550)
Supplement: inline-supplementary-material-2 [file inline-supplementary-material-2.pdf]

### Appendix 1 -Diagnoses of the vignettes used in the three phases of the study

| Inoculation intervention             | Biasing phase                         | Test phase                    |
|--------------------------------------|---------------------------------------|-------------------------------|
| <i>Jaundice-related set</i>          |                                       |                               |
| Acute viral hepatitis                | Acute viral hepatitis                 | Alcoholic cirrhosis           |
| Alcoholic cirrhosis                  |                                       | Primary sclerosis cholangitis |
| Primary sclerosis cholangitis        |                                       | Pancreas carcinoma            |
| Pancreas carcinoma                   |                                       |                               |
| <i>Chronic diarrhoea-related set</i> |                                       |                               |
| Inflammatory bowel disease           | Inflammatory bowel disease            | Celiac disease                |
| Celiac disease                       |                                       | Pseudomembranous colitis      |
| Pseudomembranous colitis             |                                       | Chronic infectious diarrhoea  |
| Chronic infectious diarrhoea         |                                       |                               |
| <i>Fillers</i>                       |                                       |                               |
| Rheumatoid arthritis                 | Stomach cancer                        | Nephrotic syndrome            |
| Hyperthyroidism                      | Meningoencephalitis                   | Heart failure                 |
| Acute pyelonephritis                 | Chronic pulmonary obstructive disease | Acute appendicitis            |
